# Supplementary material
Source: publisher figshare collection journal article supplement (https://acs.figshare.com/ndownloader/files/8055680)
Supplement: Supplementary file 1 [file 8055680]

## Supporting Information

### Hygroscopic Swelling Determination of Cellulose Nanocrystal (CNC) Films by Polarized Light Microscopy Digital Image Correlation

*Shikha Shrestha, Jairo A. Diaz, Siavash Ghanbari and Jeffrey Youngblood\**

School of Materials Engineering, Purdue University, 701 West Stadium Avenue, West Lafayette,  
Indiana 47907, Unites States

#### **Herman Order Parameter (S)<sup>1</sup>**

The equations used for the integration of the 2D XRD intensity ( $I$ ) versus azimuthal angle ( $\phi$ ) was performed from 0° to 180° around (200) plane present at  $2\theta$  for cellulose I $\beta$  are given by:

$$S = \frac{3\langle \cos^2 \gamma \rangle - 1}{2} \quad (\text{S1})$$

$$\langle \cos^2 \gamma \rangle = 1 - 2\langle \cos^2 \phi \rangle \quad (\text{S2})$$

$$\langle \cos^2 \phi \rangle = \frac{\int I(\phi) \cos^2 \phi \sin \phi \, d\phi}{\int I(\phi) \sin \phi \, d\phi} \quad (\text{S3})$$

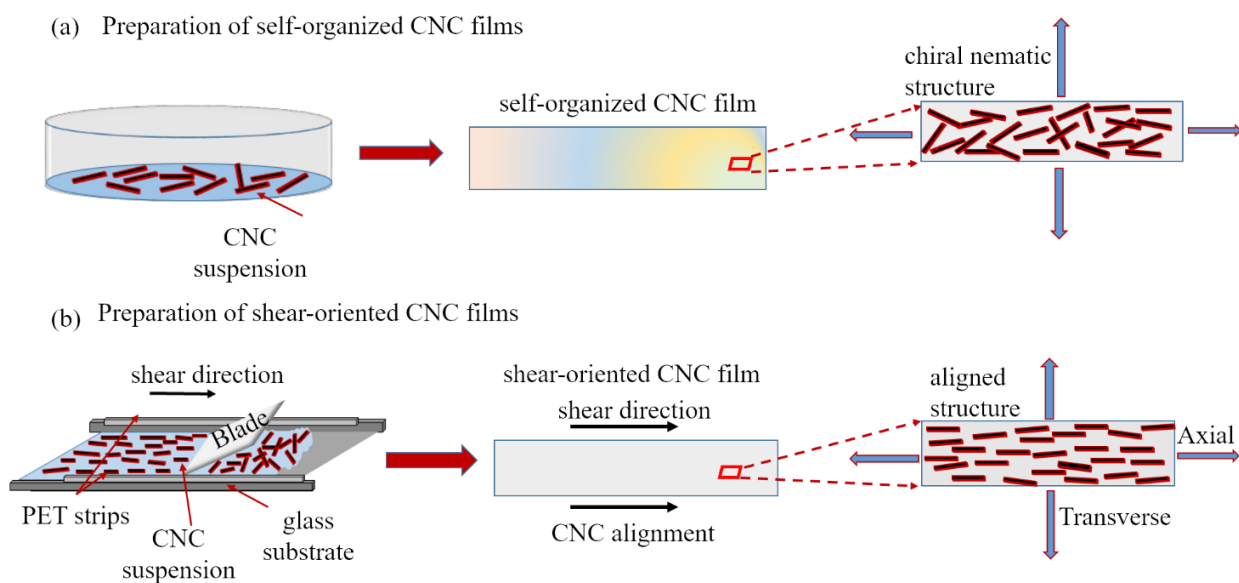

**Figure S1.** Schematic of preparation of the CNC films by casting method for (a) self-organized and (b) shear-oriented films. The directionality of the shear cast films was defined as “axial” or “transverse” for the direction parallel to or perpendicular to the shear direction.

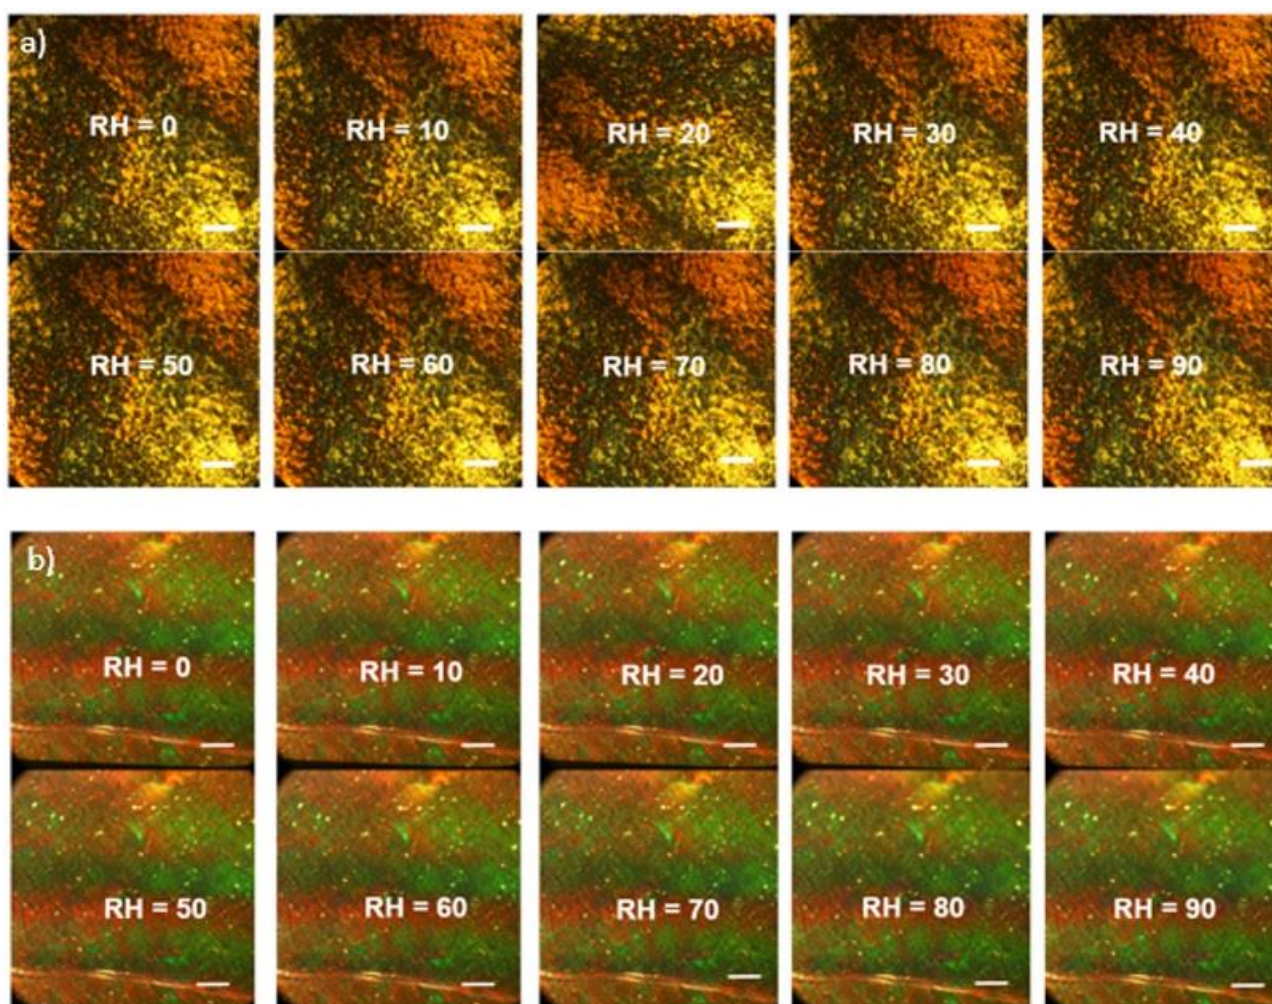

**Figure S2.** (a) self-organized CNC films (b) shear-oriented CNC films imaged under polarized light (PL) modes at different relative humidity. Scale bar 500  $\mu\text{m}$ .

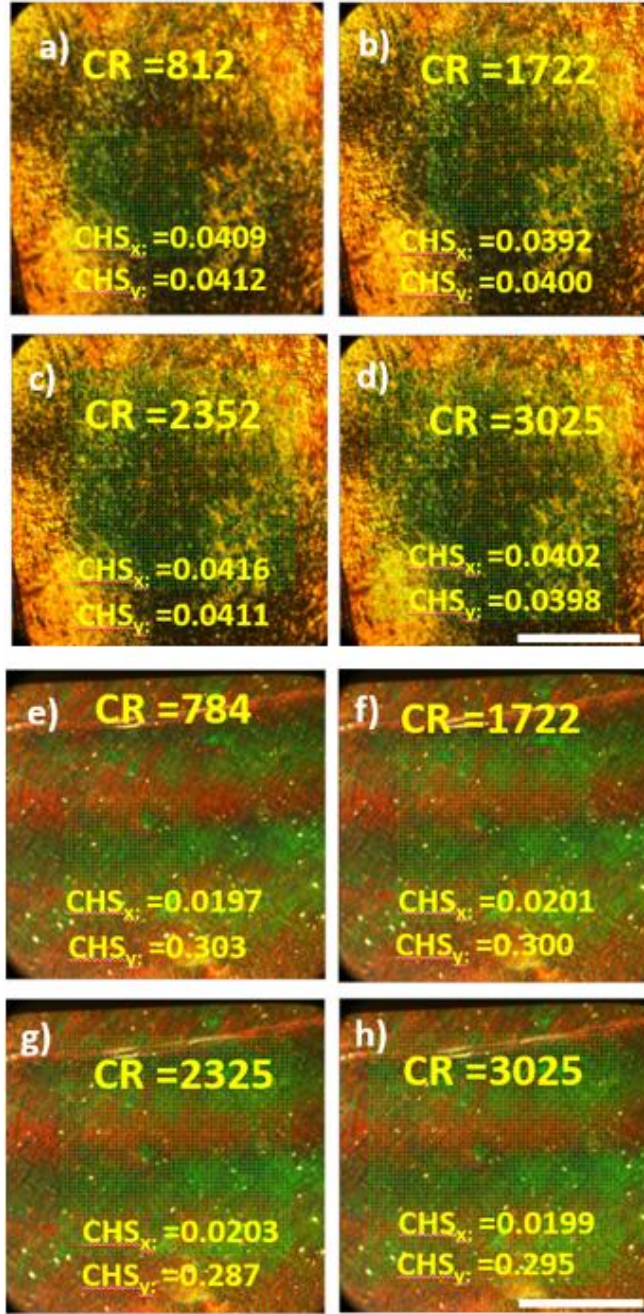

**Figure S3.** Image Correlation as a function of position and number of correlation points for a self-organized (a-d) and shear-oriented (e-h) CNC film. CR: Number of correlation points. CHS<sub>x</sub>: Coefficient of hygroscopic swelling in axial direction. CHS<sub>y</sub>: Coefficient of hygroscopic swelling in the transverse direction. Scale bar 1 mm. (CHS<sub>x</sub> = CHS<sub>axial</sub> and CHS<sub>y</sub> = CHS<sub>trans</sub>)

**Table S1.** DIC parameters used in CHS determination of self-organized and shear-oriented CNC films.

| CNC film       | Sample <sup>1</sup> | ROI | CHS<br>[%strain/ %C] | Cpcorr Size | Grid Spa. | Corr. Pts |
|----------------|---------------------|-----|----------------------|-------------|-----------|-----------|
| Self-organized | S1-1-x              | A1  | 0.0409               | 60          | 30 x 30   | 2352      |
|                | S2-2-x              | B1  | 0.0392               | 60          | 30 x 30   | 1722      |
|                | S2-3-y              | C1  | 0.0412               | 60          | 30 x 30   | 1722      |
|                | S3-1-y              | D1  | 0.0400               | 60          | 30 x 30   | 812       |
|                | S1-2-y              | E1  | 0.0416               | 60          | 30 x 30   | 3025      |
| Shear-oriented | S1-1-x              | A2  | 0.0203               | 60          | 30 x 30   | 2304      |
|                | S1-2-x              | B2  | 0.0202               | 60          | 30 x 30   | 1722      |
|                | S1-3-x              | C2  | 0.0201               | 60          | 30 x 30   | 1722      |
|                | S2-1-x              | D2  | 0.0197               | 60          | 30 x 30   | 784       |
|                | S3-2-x              | E2  | 0.0199               | 60          | 30 x 30   | 3025      |
|                | S1-1-y              | A3  | 0.287                | 90          | 30 x 30   | 2304      |
|                | S3-3-y              | B3  | 0.310                | 60          | 30 x 30   | 1764      |
|                | S2-1-y              | C3  | 0.298                | 60          | 30 x 30   | 1764      |
|                | S1-2-y              | D2  | 0.303                | 30          | 30 x 30   | 784       |
|                | S3-3-y              | E3  | 0.295                | 60          | 30 x 30   | 3080      |

<sup>1</sup> Sample#-Run#-direction

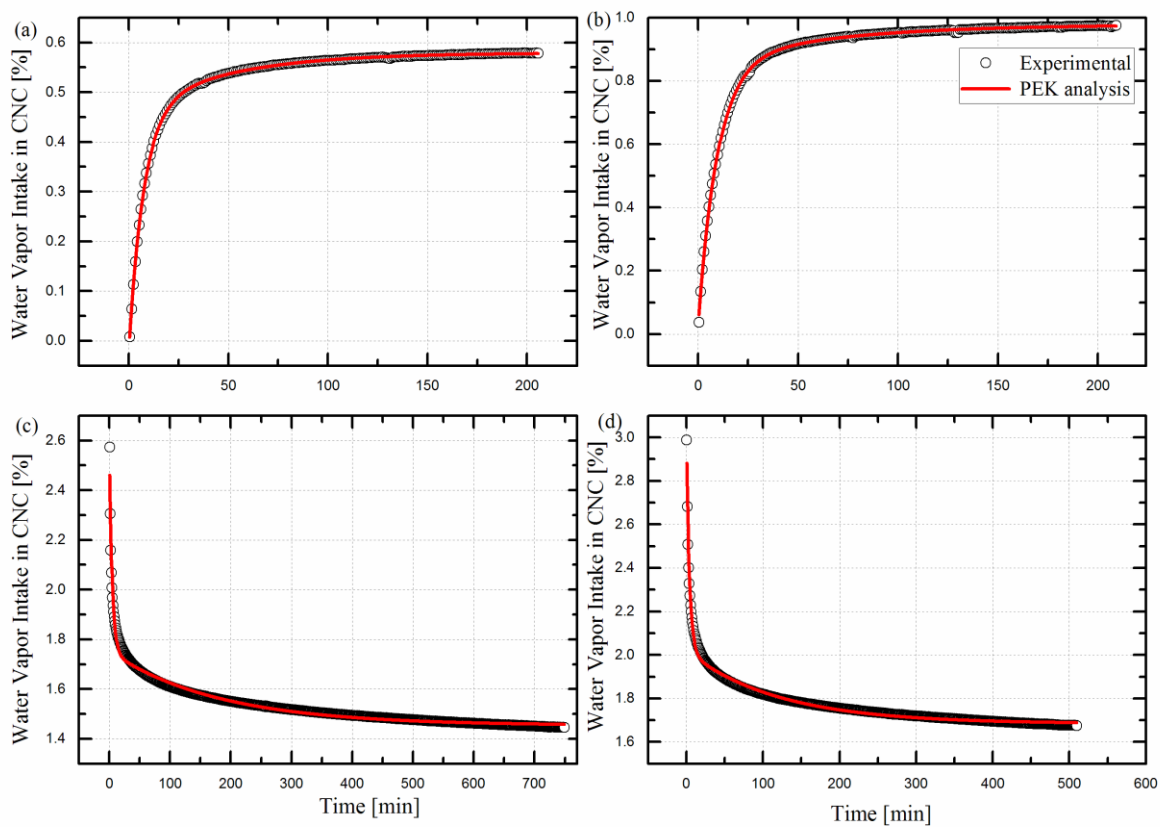

**Figure S4.** PEK simulation of experimental data of adsorption-desorption for self-organized (a) and (c) and shear-oriented (b) and (d) CNC films 30% RH and 23°C.



**Table S2.** Computed values of GAB parameters and correlation coefficients obtained from analysis of moisture sorption isotherms of CNC films.

| CNC Films      |            | Crystallinity<br>(%) | $W_m$<br>(g/g) | $W_m^{Corr}$<br>(g/g) | $C_G$ | $K$   | Ref.      |
|----------------|------------|----------------------|----------------|-----------------------|-------|-------|-----------|
| self-organized | adsorption | 72 <sup>2</sup>      | 0.033          | 0.124                 | 6.518 | 0.912 | this work |
|                | desorption |                      | 0.052          | 0.186                 | 5.129 | 0.867 |           |
| shear-oriented | adsorption | 72 <sup>2</sup>      | 0.035          | 0.125                 | 6.004 | 0.913 |           |
|                | desorption |                      | 0.048          | 0.172                 | 5.896 | 0.882 |           |

**Table S3.** Amount of water sorbed by various celluloses at the monolayer corrected for degree of crystallinity.<sup>3</sup>

| Sample                     | Crystallinity<br>(%) | $W_m$<br>(g/g) | $W_m^{Corr}$<br>(g/g) | Ref. |
|----------------------------|----------------------|----------------|-----------------------|------|
| Cotton                     | 70                   | 0.032          | 0.107                 | 4    |
| Cellophane                 | 70                   | 0.059          | 0.098                 | 5    |
| Microcrystalline Cellulose | 63                   | 0.036          | 0.096                 | 6    |
| Microcrystalline Cellulose | 40                   | 0.066          | 0.107                 | 4    |

**Table S4.** Computed values of PEK's model parameters  $M_1$ ,  $M_2$ ,  $\tau_1$  and  $\tau_2$ , corresponding to fast (1) and slow (2) kinetics for lower RH of 30%.

| Relative Humidity 30% |                     |                  |                     |                   |       |
|-----------------------|---------------------|------------------|---------------------|-------------------|-------|
| CNC Films             | $M_1$               | $\tau_1$         | $M_2$               | $\tau_2$          | $R^2$ |
| self-organized        | $0.782 \pm 0.00128$ | $59.7 \pm 0.570$ | $0.131 \pm 0.00121$ | $8.92 \pm 0.0347$ | 0.997 |
| shear-oriented        | $0.825 \pm 0.00324$ | $60.97 \pm 2.12$ | $0.132 \pm 0.00293$ | $9.06 \pm 0.0631$ | 0.999 |

**Table S5.** Computed values of PEK's model parameters  $M_1$ ,  $M_2$ ,  $\tau_1$  and  $\tau_2$ , corresponding to fast (1) and slow (2) kinetics for higher RH of 90%.

| Relative Humidity 90% |                    |                  |                   |                  |       |
|-----------------------|--------------------|------------------|-------------------|------------------|-------|
| CNC Films             | $M_1$              | $\tau_1$         | $M_2$             | $\tau_2$         | $R^2$ |
| self-organized        | $0.972 \pm 0.0061$ | $14.8 \pm 0.085$ | $5.04 \pm 0.0151$ | $245.8 \pm 3.34$ | 0.999 |
| shear-oriented        | $0.946 \pm 0.0054$ | $14.5 \pm 0.061$ | $5.31 \pm 0.0177$ | $240.7 \pm 2.76$ | 0.998 |



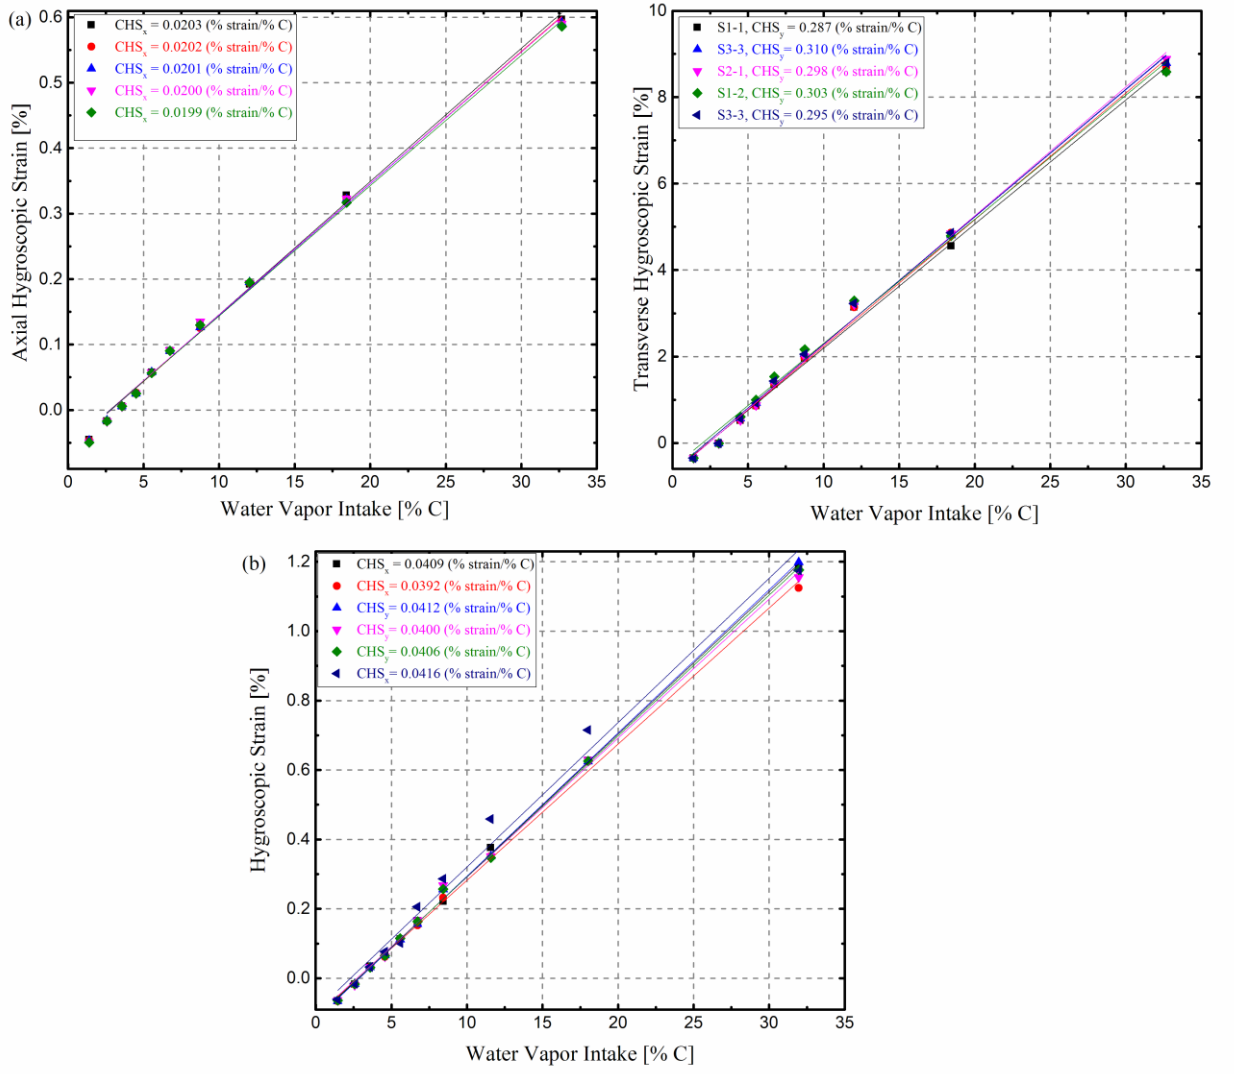

**Figure S5.** Determination of Coefficient of hygroscopic swelling in (a) shear-oriented (b) self-organized CNC films with different direction. ( $\text{CHS}_x = \text{CHS}_{\text{axial}}$  and  $\text{CHS}_y = \text{CHS}_{\text{trans}}$ ).

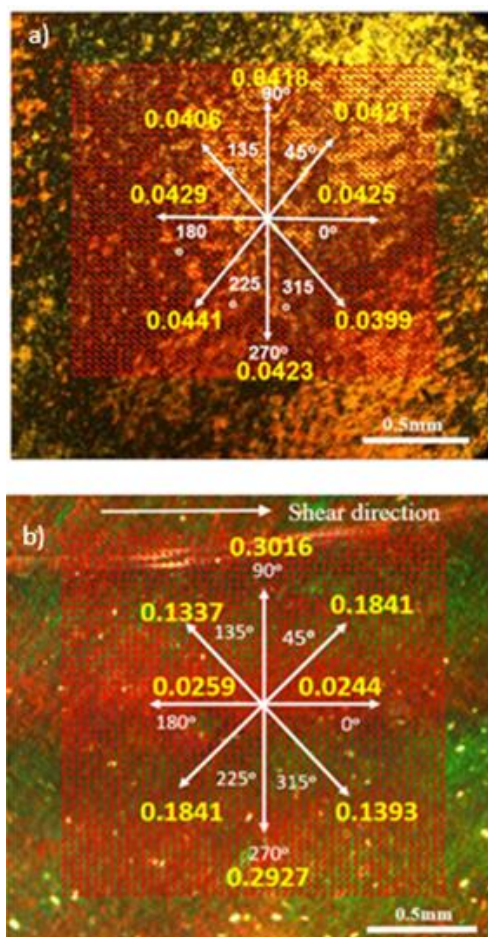

**Figure S6.** In-plane coefficient of hygroscopic swelling values for (a) self-organized and (b) shear-oriented CNC films at an angular increment of 45°. The CHS of self-organized film is isotropic whereas that of shear-oriented is anisotropic.

## REFERENCES

- (1) Hermans, P. H.; Hermans, J. J.; Vermaas, D.; Weidinger, A. *Recl. des Trav. Chim. des Pays-Bas* **2010**, 63, 44–45.
- (2) Yoo, Y.; Youngblood, J. P. *ACS Sustain. Chem. Eng.* **2016**, 4, 3927–3938.
- (3) Zograf, G.; Kontny, M. J. *Pharm. Res.* **1986**, 3, 187–194.
- (4) Nakao, Y.; Fukuoka, E.; Nakajima, S.; Hasegawa, J. *Chem. Pharm. Bull. (Tokyo)*. **1977**, 25, 96–101.

- (5) Agrawal, A. M.; Manek, R. V.; Kolling, W. M.; Neau, S. H. *J. Pharm. Sci.* **2004**, 93, 1766–1779.
- (6) Locke, E. G. *Sci. AAAS* **1965**, 147, 595–596.
